# Supplementary material for: Productive infection of primary human hepatocytes with SARS-CoV-2 induces antiviral and proinflammatory responses
Source: HighWire-hosted journal article supplement (doi:10.1136/gutjnl-2023-330961), 2023-12-12
Supplement: gutjnl-2023-330961supp001_data_supplement.pdf [file gutjnl-2023-330961supp001_data_supplement.pdf]

## **Productive infection of primary human hepatocytes with SARS-CoV-2 induces antiviral and proinflammatory responses**

Natalie Heinen<sup>1\*</sup>, Rajendra Khanal<sup>2,3\*</sup>, Saskia Westhoven<sup>1</sup>, Mara Klöhn<sup>1</sup>, Simon Herrmann<sup>1</sup>, Maike Herrmann<sup>4</sup>, Tran Tuoc<sup>5</sup>, Pauline Antonie Ulmke<sup>5</sup>, Hoang Duy Nguyen<sup>5</sup>, Huu Phuc Nguyen<sup>5</sup>, Eike Steinmann<sup>1,6</sup>, Daniel Todt<sup>1,7</sup>, Richard J.P. Brown<sup>1,4#</sup>, Amar Deep Sharma<sup>2,3#</sup>, and Stephanie Pfaender<sup>1#</sup>

1. Department for Molecular and Medical Virology, Ruhr University Bochum, Bochum, Germany.
2. Department of Gastroenterology, Hepatology, Infectious Diseases and Endocrinology, Hannover Medical School, Hannover, Germany.
3. Research Group RNA Therapeutics & Liver Regeneration, REBIRTH-Research Center for Translational Regenerative Medicine, Hannover Medical School, Hannover, Germany.
4. Division of Veterinary Medicine, Paul Ehrlich Institute, Langen, Germany
5. Department of Human Genetics, Ruhr University of Bochum, Bochum, Germany
6. German Centre for Infection Research (DZIF), External Partner Site, Bochum, Germany
7. European Virus Bioinformatics Center (EVBC), Jena, Germany.

\*These authors share the first authorship.

#Corresponding authors:

### **Stephanie Pfaender**

Department for Molecular and Medical Virology

Ruhr-Universität Bochum, Bochum, Germany

Email: stephanie.pfaender@rub.de

### **Amar Deep Sharma**

Department of Gastroenterology, Hepatology, Infectious Diseases and Endocrinology,

Research Group Liver Regeneration & RNA Therapeutics

REBIRTH-Research Center for Translational Regenerative Medicine

Hannover Medical School, Hannover, Germany

Email: Sharma.Amar@mh-hannover.de

### **Richard J.P. Brown**

Department for Molecular and Medical Virology

Ruhr-Universität Bochum, Bochum, Germany

Email: [richard.brown@ruhr-uni-bochum.de](mailto:richard.brown@ruhr-uni-bochum.de)

Supplementary Material

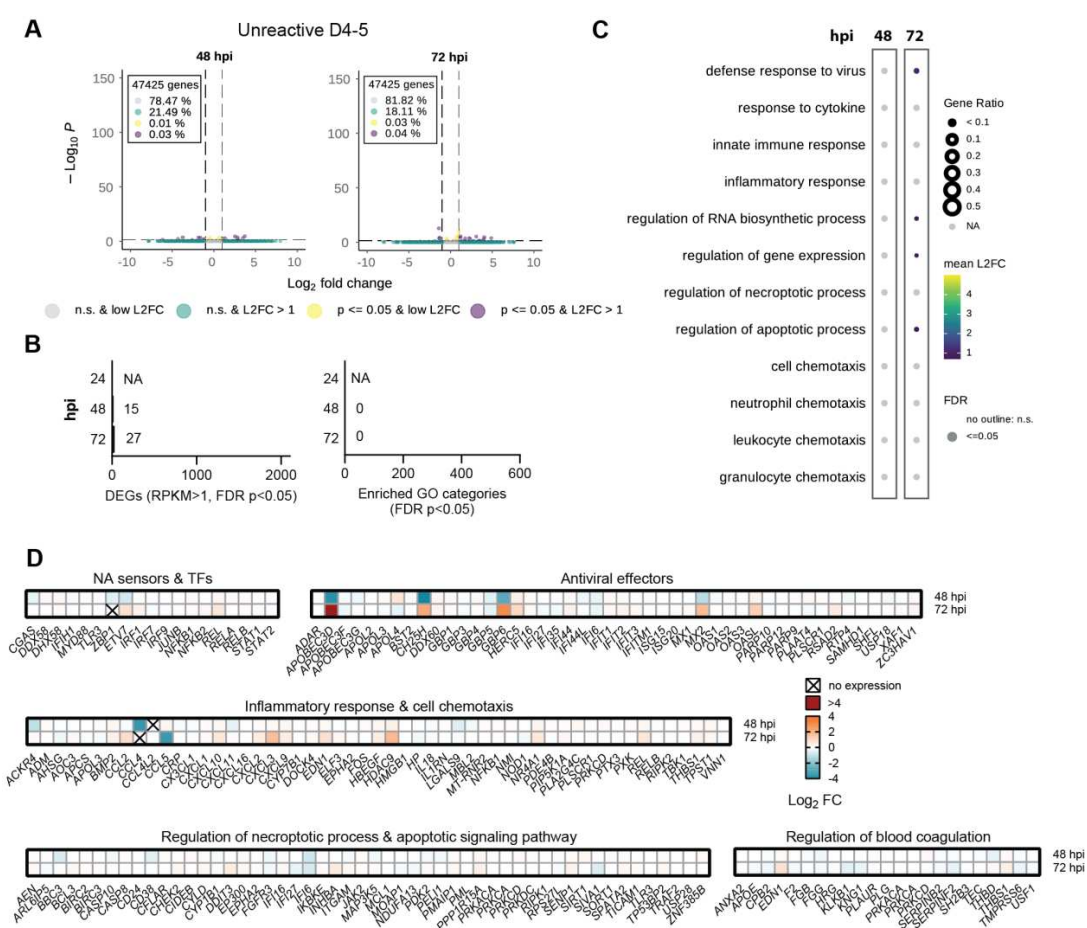

**Supplementary Fig. 1. SARS-CoV-2 infection induces minimal transcriptional deregulation in unresponsive PHH donors.** (A) Volcano plots highlight numbers of significantly dysregulated transcripts from the two unreactive PHH donors (D4-5) at the indicated time points. (B) Numbers SARS-CoV-2-induced differentially expressed genes in unreactive donors (DEGs; top) and enriched gene ontology (GO terms; bottom) at the indicated timepoints (n=2 donors; D4-5). (C) No significant enrichment of GO terms in SARS-CoV-2-unresponsive PHHs at 72 hpi (12 representative categories shown). (D) Heat maps indicate minimal induction of host transcripts in SARS-CoV-2 unresponsive PHHs at 48 and 72 hpi associated with the indicated categories (means from n=2 donors; D4-5).

**Supplementary Table S1.** Extended information on PHH Donors provided from PRIMACYT Cell Culture Technology GmbH

|    | Company Lot #   | Pathology                | Species | Gender | Race      | BMI   | Smoker | Alcohol use  | Drug use | Seeding density (cells/cm <sup>2</sup> ) |
|----|-----------------|--------------------------|---------|--------|-----------|-------|--------|--------------|----------|------------------------------------------|
| D1 | CyHuf19002      | Hepatic metastases       | Human   | Female | Caucasian | 23    | No     | No           | No       | 212,000                                  |
| D2 | CHM2225-He-Z    | Hepatocellular Carcinoma | Human   | Male   | Caucasian | 27.99 | No     | No           | No       | 210,000                                  |
| D3 | NHM2251-HE-N    | Head Trauma              | Human   | Male   | Hispanic  | 25.8  | N/A    | N/A          | N/A      | 160,000                                  |
| D4 | CHM2221-HE-C    | Cholangio-carcinoma      | Human   | Male   | Caucasian | 24.33 | Yes    | No           | No       | 237,000                                  |
| D5 | CyHum19008-HE-C | Liver Mass               | Human   | Male   | Caucasian | 36.51 | No     | Occasionally | No       | 212,000                                  |
| D6 | NHM2252-HE-N    | Anoxia                   | Human   | Male   | Caucasian | 29.1  | No     | Occasionally | N/A      | 212,000                                  |
